# Supplementary material for: Solute–solvent interactions in imidazolium camphorsulfonate ionic liquids
Source: Royal Society of Chemistry journal article supplement (doi:10.1039/b709407h), 2007-01-01
Supplement: b709407h.pdf [file b709407h.pdf]

### Supplementary Information

## Solute–Solvent Interactions in Imidazolium Camphorsulfonate Ionic Liquids

Kaoru Nobuoka, Satoshi Kitaoka, Masashi Iio, Thomas Harran and Yuichi Ishikawa\*

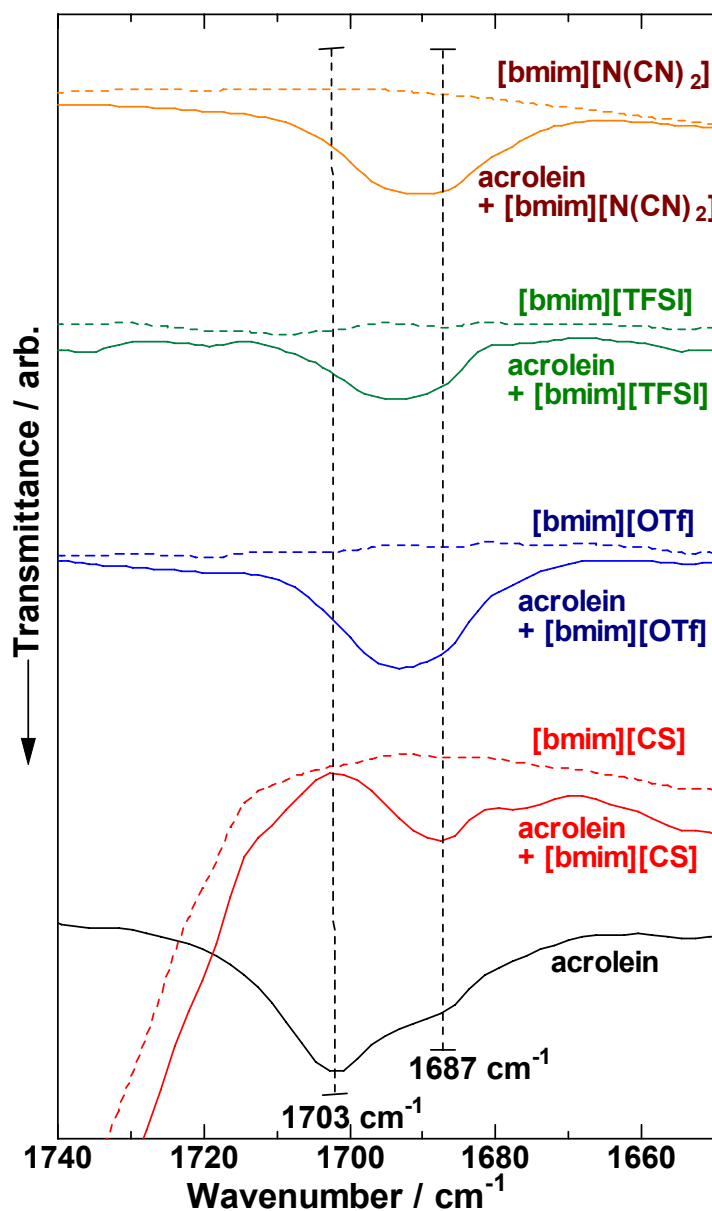

**Fig. S1** Influence for additional imidazolium ILs on the carbonyl stretching of acrolein: acrolein (black line); acrolein with [bmim][CS] (1 : 5 v./v.) (red solid line); [bmim][CS] (red dashed line); acrolein with [bmim][OTf] (1 : 5 v./v.) (blue solid line); [bmim][OTf] (Blue dashed line); acrolein with [bmim][TFSI] (1 : 5 v./v.) (green solid line); [bmim][TFSI] (green dashed line); acrolein with [bmim][N(CN)<sub>2</sub>] (1 : 5 v./v.) (orange solid line); [bmim][N(CN)<sub>2</sub>] (orange dashed line). FT–IR spectra were measured at room

temperature in neat state containing no methanol.
